# Supplementary material
Source: PubMed Central journal article supplement (PMC4382438)
Supplement: NIHMS644189-supplement-11095_2014_1564_MOESM3_ESM.pdf [file NIHMS644189-supplement-11095_2014_1564_MOESM3_ESM.pdf]

Table S3

|           |                     |          |
|-----------|---------------------|----------|
| ALDH1B1*2 | DOPE score          | -58565.9 |
| (A86V)    | Z score             | -13.5002 |
|           | Minimization Energy | -393390  |
| ALDH1B1*3 | DOPE score          | -58137.2 |
| (L107R)   | Z score             | -13.5356 |
|           | Minimization Energy | -395944  |
| ALDH1B1*5 | DOPE score          | -58403.7 |
| (M253V)   | Z score             | -13.6703 |
|           | Minimization Energy | -406335  |
| ALDH1B1*1 | DOPE score          | -58968.1 |
| (WT)      | Z score             | -13.5177 |
|           | Minimization Energy | -395741  |
