# Supplementary material
Source: PubMed Central journal article supplement (PMC4382438)

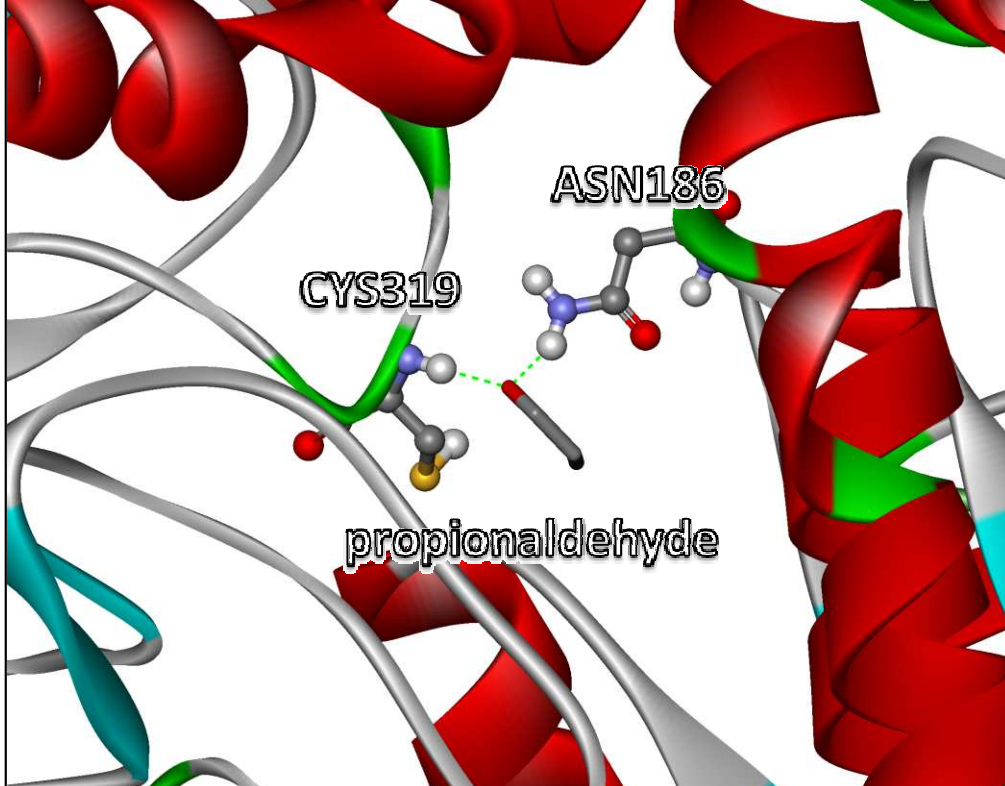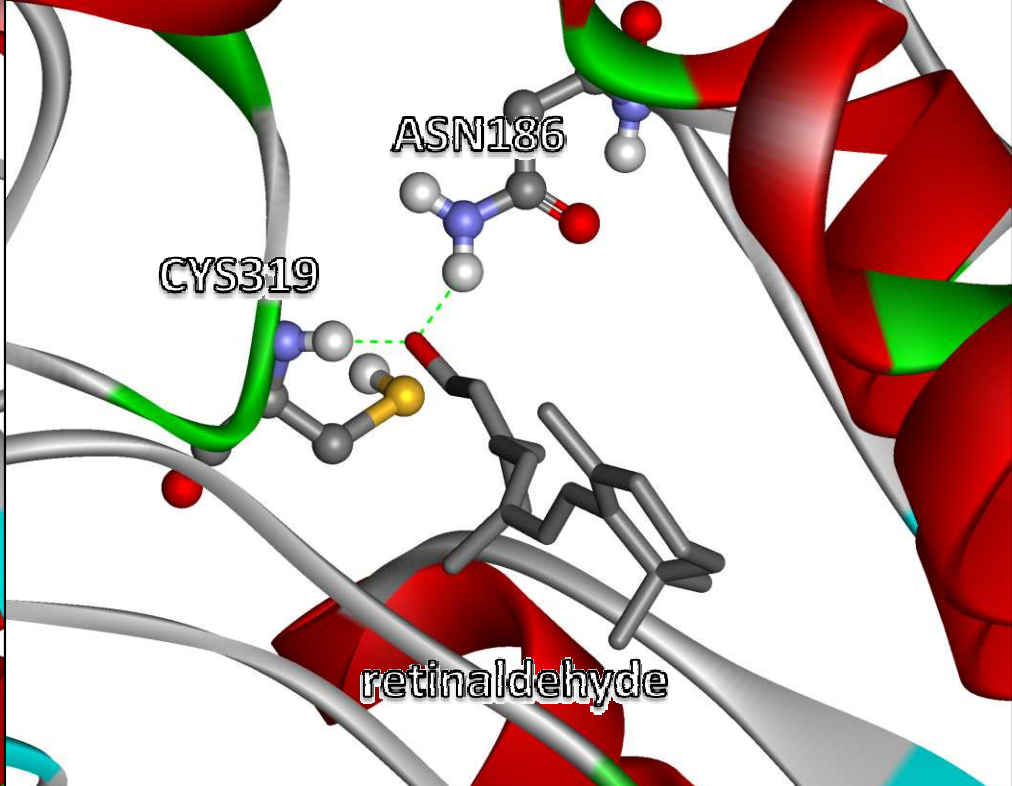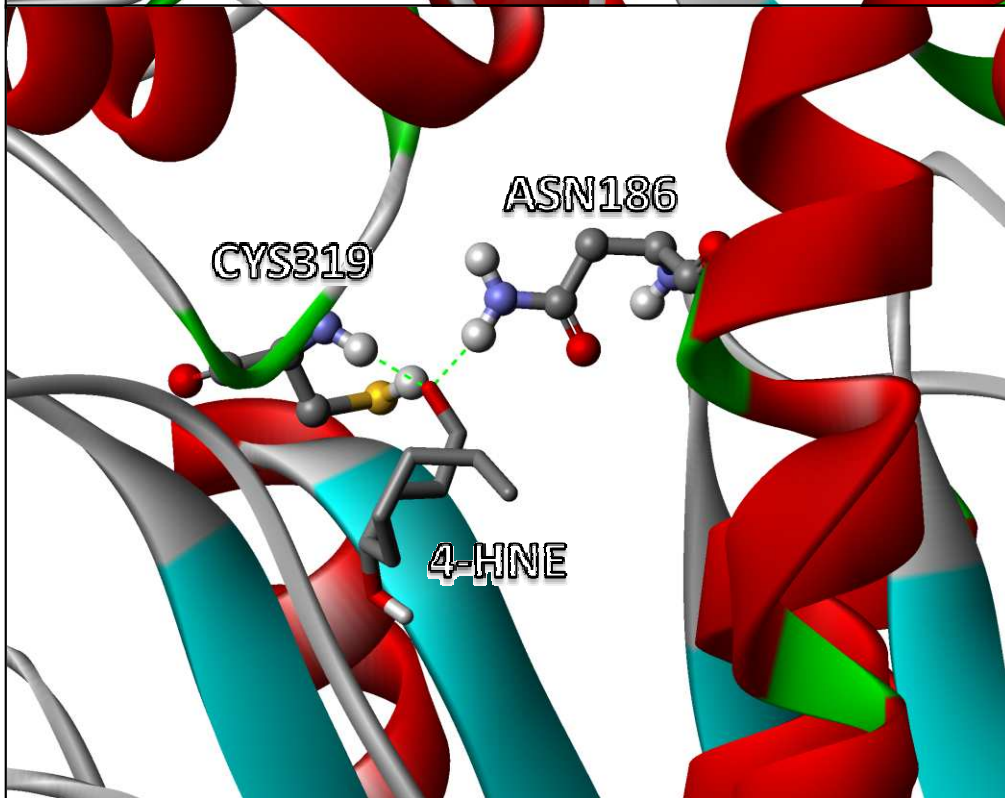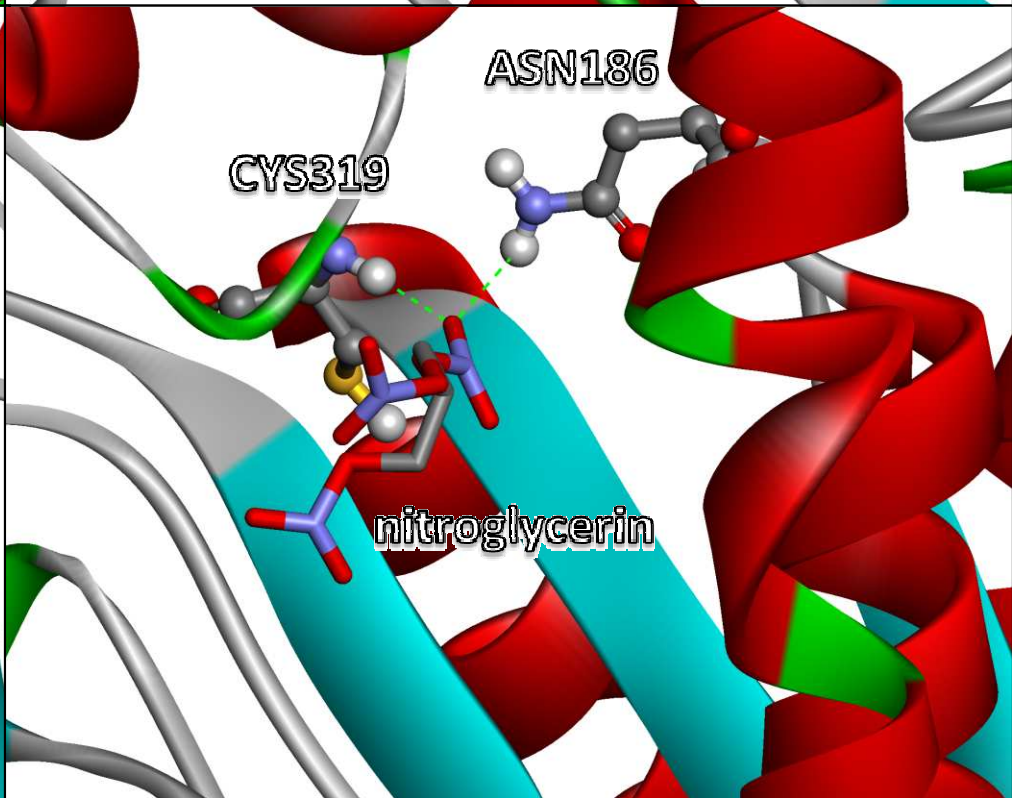

Supplement: NIHMS644189-supplement-11095_2014_1564_MOESM2_ESM.pdf [file NIHMS644189-supplement-11095_2014_1564_MOESM2_ESM.pdf]
